# Supplementary material for: Time from diagnosis to treatment of colorectal cancer in a South Australian clinical registry cohort: how it varies and relates to survival
Source: PubMed Central journal article supplement — BMJ Open. 2019 Sep 30;9(9):e031421. doi: 10.1136/bmjopen-2019-031421 (PMC6797269; doi:10.1136/bmjopen-2019-031421), 2019-09-30
Supplement: bmjopen-2019-031421supp001.pdf [file bmjopen-2019-031421supp001.pdf]

## Supplementary tables

Table S1: Relative odds (95% CLs) of treatment for colon cancer starting &gt;30 days of diagnosis by treatment type, stage, and socioeconomic factors: South Australian major public hospitals, 2000-2010 diagnoses\*

|                                  | Surgery |                     | Radiotherapy |                     | Chemotherapy |                     | Any treatment (surgical cases) |                     |
|----------------------------------|---------|---------------------|--------------|---------------------|--------------|---------------------|--------------------------------|---------------------|
|                                  | n=1098  | RO (95% CLs)        | n=86         | RO (95% CLs)        | n=898        | RO (95% CLs)        | n=1098                         | RO (95% CLs)        |
| <b>Age at diagnosis (years):</b> |         |                     |              |                     |              |                     |                                |                     |
| <50 (ref.)                       | 53      | 1.00                | 13           | 1.00                | 109          | 1.00                | 53                             | 1.00                |
| 50 - 59                          | 116     | 1.61 (0.75, 3.46)   | 14           | 1.03 (0.05, 21.46)  | 176          | 0.84 (0.40, 1.76)   | 116                            | 1.28 (0.59, 2.78)   |
| 60 - 69                          | 226     | 2.10 (1.03, 4.28)   | 20           | 2.82 (0.20, 40.71)  | 273          | 0.91 (0.45, 1.83)   | 226                            | 1.86 (0.92, 3.80)   |
| 70 - 79                          | 396     | 1.65 (0.83, 3.28)   | 28           | 3.49 (0.27, 45.20)  | 292          | 1.37 (0.68, 2.79)   | 396                            | 1.55 (0.78, 3.09)   |
| 80+                              | 307     | 1.50 (0.74, 3.03)   | 11           | NA                  | 48           | 2.52 (0.78, 8.17)   | 307                            | 1.43 (0.71, 2.88)   |
| <b>Sex:</b>                      |         |                     |              |                     |              |                     |                                |                     |
| Male (ref.)                      | 562     | 1.00                | 56           | 1.00                | 491          | 1.00                | 562                            | 1.00                |
| Female                           | 536     | 0.87 (0.67, 1.13)   | 30           | 2.65 (0.27, 1.64)   | 407          | 1.23 (0.79, 1.91)   | 536                            | 0.89 (0.68, 1.16)   |
| <b>Socioeconomic:</b>            |         |                     |              |                     |              |                     |                                |                     |
| Low (ref.)                       | 336     | 1.00                | 25           | 1.00                | 287          | 1.00                | 336                            | 1.00                |
| Low-Med                          | 273     | 1.69 (0.99, 2.12)   | 19           | 1.69 (0.09, 30.68)  | 229          | 0.71 (0.39, 1.27)   | 273                            | 1.46 (1.00, 2.14)   |
| Med-High                         | 224     | 1.31 (0.90, 1.90)   | 20           | 7.01 (0.22, 223.56) | 185          | 0.93 (0.49, 1.78)   | 224                            | 1.28 (0.88, 1.88)   |
| High                             | 265     | 1.12 (0.76, 1.67)   | 22           | 1.37 (0.07, 27.36)  | 197          | 0.85 (0.45, 1.62)   | 265                            | 1.09 (0.73, 1.62)   |
| <b>Accessibility:</b>            |         |                     |              |                     |              |                     |                                |                     |
| High (ref.)                      | 899     | 1.00                | 66           | 1.00                | 716          | 1.00                | 899                            | 1.00                |
| Med-High                         | 141     | 0.57 (0.28, 1.15)   | 9            | NA                  | 127          | 0.41 (0.09, 1.97)   | 141                            | 0.57 (0.28, 1.16)   |
| Poor                             | 58      | 0.71 (0.33, 1.57)   | 11           | NA                  | 55           | 0.25 (0.05, 1.21)   | 58                             | 0.63 (0.28, 1.38)   |
| <b>Local Health Network:</b>     |         |                     |              |                     |              |                     |                                |                     |
| Northern metro (ref.)            | 149     | 1.00                | 12           | 1.00                | 141          | 1.00                | 149                            | 1.00                |
| Central metro                    | 421     | 0.49 (0.32, 0.75)   | 33           | 0.31 (0.01, 6.39)   | 291          | 0.85 (0.41, 1.76)   | 421                            | 0.48 (0.31, 0.73)   |
| Southern metro                   | 281     | 0.39 (0.25, 0.63)   | 16           | 0.58 (0.03, 11.80)  | 252          | 0.83 (0.39, 1.78)   | 281                            | 0.37 (0.24, 0.60)   |
| Country South                    | 88      | 0.69 (0.36, 1.33)   | 10           | NA                  | 83           | 3.94 (0.70, 22.22)  | 88                             | 0.69 (0.36, 1.34)   |
| Country North                    | 159     | 0.78 (0.37, 1.66)   | 15           | NA                  | 131          | 2.42 (0.47, 12.36)  | 159                            | 0.76 (0.35, 1.63)   |
| <b>ACPS stage:</b>               |         |                     |              |                     |              |                     |                                |                     |
| A (ref.)                         | 169     | 1.00                | 3            | 1.00                | 12           | 1.00                | 169                            | 1.00                |
| B                                | 471     | 0.67 (0.46, 0.98)   | 20           | 43.60 (0.38, 49.56) | 130          | 1.60 (0.16, 16.54)  | 471                            | 0.65 (0.45, 0.95)   |
| C                                | 252     | 0.69 (0.46, 1.06)   | 21           | 24.12 (0.22, 26.91) | 409          | 1.76 (0.19, 16.48)  | 252                            | 0.66 (0.43, 1.00)   |
| D                                | 180     | 0.54 (0.33, 0.86)   | 39           | 4.39 (0.07, 27.89)  | 320          | 0.24 (0.03, 2.17)   | 180                            | 0.44 (0.27, 0.72)   |
| (UK)                             | (26)    | (0.64 (0.26, 1.57)) | (3)          | NA                  | (27)         | (0.41 (0.04, 4.48)) | (26)                           | (0.58 (0.23, 1.43)) |
| <b>Grade:</b>                    |         |                     |              |                     |              |                     |                                |                     |
| Well diff. (ref.)                | 38      | 1.00                | 5            | 1.00                | 18           | 1.00                | 38                             | 1.00                |
| Mod diff.                        | 770     | 0.85 (0.43, 1.68)   | 53           | 1.49 (0.11, 19.97)  | 581          | 0.58 (0.07, 4.81)   | 770                            | 0.82 (0.41, 1.62)   |
| Poorly/undiff.                   | 209     | 0.57 (0.27, 1.21)   | 19           | 1.11 (0.06, 21.24)  | 213          | 0.46 (0.05, 3.89)   | 209                            | 0.54 (0.26, 1.15)   |
| (UK)                             | (81)    | (1.87 (0.82, 4.26)) | (9)          | NA                  | (86)         | (0.13 (0.02, 1.11)) | (81)                           | (1.62 (0.71, 3.69)) |
| <b>Diagnosis year:</b>           |         |                     |              |                     |              |                     |                                |                     |
| 2000 - 2005                      | 541     | 1.00                | 52           | 1.00                | 451          | 1.00                | 541                            | 1.00                |
| 2006 - 2010                      | 557     | 1.41 (1.09, 1.83)   | 34           | 0.21 (0.03, 1.64)   | 447          | 1.59 (1.02, 2.48)   | 557                            | 1.39 (1.07, 2.88)   |

\*Derived from multivariate logistic regression (see "Methods")

RO – Relative odds; CLs – confidence limits; ref. – reference; NA – not applicable; ACPS- Australian Clinico-Pathological Staging; UK – unknown; diff – differentiated; undiff. - undifferentiated.

Table S2: Relative odds (95% CLs) of treatment for colon cancer starting &gt;60 days of diagnosis by treatment type, stage, and socio-demographic factors: South Australian major public hospitals, 2000-2010 diagnoses\*

|                                  | Surgery |                     | Radiotherapy |                     | Chemotherapy |                     | Any treatment (surgical cases only) |                     |
|----------------------------------|---------|---------------------|--------------|---------------------|--------------|---------------------|-------------------------------------|---------------------|
|                                  | n=1098  | RO (95% CLs)        | n=86         | RO (95% CLs)        | n=898        | RO (95% CLs)        | n=1098                              | RO (95% CLs)        |
| <b>Age at diagnosis (years):</b> |         |                     |              |                     |              |                     |                                     |                     |
| <50 (ref.)                       | 53      | 1.00                | 13           | 1.00                | 109          | 1.00                | 53                                  | 1.00                |
| 50 - 59                          | 116     | 1.34 (0.51, 3.51)   | 14           | 0.06 (0.00, 1.37)   | 176          | 0.94 (0.57, 1.55)   | 116                                 | 0.75 (0.25, 2.21)   |
| 60 - 69                          | 226     | 1.28 (0.51, 3.20)   | 20           | 0.17 (0.01, 3.57)   | 273          | 1.16 (0.73, 1.84)   | 226                                 | 1.10 (0.41, 2.93)   |
| 70 - 79                          | 396     | 1.10 (0.45, 2.66)   | 28           | 0.35 (0.02, 7.07)   | 292          | 1.26 (0.80, 2.01)   | 396                                 | 0.99 (0.38, 2.53)   |
| 80+                              | 307     | 1.00 (0.40, 2.47)   | 11           | 0.30 (0.01, 7.36)   | 48           | 1.60 (0.78, 3.29)   | 307                                 | 1.01 (0.38, 2.65)   |
| <b>Sex:</b>                      |         |                     |              |                     |              |                     |                                     |                     |
| Male (ref.)                      | 562     | 1.00                | 56           | 1.00                | 491          | 1.00                | 562                                 | 1.00                |
| Female                           | 536     | 0.83 (0.57, 1.20)   | 30           | 1.01 (0.23, 4.35)   | 407          | 0.84 (0.64, 1.14)   | 536                                 | 0.94 (0.62, 1.41)   |
| <b>Socioeconomic:</b>            |         |                     |              |                     |              |                     |                                     |                     |
| Low (ref.)                       | 336     | 1.00                | 25           | 1.00                | 287          | 1.00                | 336                                 | 1.00                |
| Low-med                          | 273     | 1.58 (0.93, 2.71)   | 19           | 0.40 (0.06, 2.51)   | 229          | 0.75 (0.51, 1.10)   | 273                                 | 1.65 (0.92, 2.98)   |
| Med-high                         | 224     | 1.14 (0.68, 1.94)   | 20           | 1.78 (0.26, 12.39)  | 185          | 0.86 (0.58, 1.28)   | 224                                 | 1.14 (0.64, 2.04)   |
| High                             | 265     | 1.19 (0.67, 2.10)   | 22           | 1.04 (0.15, 7.27)   | 197          | 1.18 (0.78, 1.77)   | 265                                 | 1.41 (0.75, 2.63)   |
| <b>Accessibility:</b>            |         |                     |              |                     |              |                     |                                     |                     |
| High (ref.)                      | 899     | 1.00                | 66           | 1.00                | 716          | 1.00                | 899                                 | 1.00                |
| Med-high                         | 141     | 0.54 (0.20, 1.42)   | 9            | 8.99 (0.24, 331.28) | 127          | 1.57 (0.75, 3.30)   | 141                                 | 0.45 (0.16, 1.25)   |
| Poor                             | 58      | 0.65 (0.21, 1.97)   | 11           | 3.90 (0.11, 141.05) | 55           | 0.83 (0.36, 1.93)   | 58                                  | 0.41 (0.12, 1.44)   |
| <b>Local Health Network:</b>     |         |                     |              |                     |              |                     |                                     |                     |
| Northern metro (ref.)            | 149     | 1.00                | 12           | 1.00                | 141          | 1.00                | 149                                 | 1.00                |
| Central metro                    | 421     | 0.56 (0.32, 0.98)   | 33           | 0.16 (0.01, 1.98)   | 291          | 0.91 (0.58, 1.43)   | 421                                 | 0.44 (0.24, 0.79)   |
| Southern metro                   | 281     | 0.46 (0.25, 0.87)   | 16           | 0.17 (0.01, 2.26)   | 252          | 0.96 (0.61, 1.52)   | 281                                 | 0.29 (0.14, 0.58)   |
| Country South                    | 88      | 0.87 (0.36, 2.14)   | 10           | 0.08 (0.00, 2.02)   | 83           | 0.93 (0.43, 2.01)   | 88                                  | 0.87 (0.34, 2.21)   |
| Country North                    | 157     | 1.04 (0.38, 2.90)   | 15           | 0.03 (0.00, 1.61)   | 131          | 0.74 (0.33, 1.76)   | 157                                 | 1.23 (0.43, 3.57)   |
| <b>ACPS stage:</b>               |         |                     |              |                     |              |                     |                                     |                     |
| A (ref.)                         | 169     | 1.00                | 3            | 1.00                | 12           | 1.00                | 169                                 | 1.00                |
| B                                | 471     | 1.02 (0.54, 1.91)   | 20           | 0.79 (0.03, 23.99)  | 130          | 0.43 (0.10, 1.74)   | 471                                 | 0.80 (0.42, 1.53)   |
| C                                | 252     | 2.34 (1.25, 4.40)   | 21           | 0.57 (0.02, 18.97)  | 409          | 0.29 (0.07, 1.15)   | 252                                 | 1.54 (0.80, 2.96)   |
| D                                | 180     | 2.25 (1.16, 4.35)   | 39           | 0.94 (0.03, 26.42)  | 320          | 0.26 (0.07, 1.03)   | 180                                 | 1.49 (0.74, 2.98)   |
| (UK)                             | (26)    | (1.65 (0.51, 5.33)) | (3)          | NA                  | (27)         | (0.67 (0.14, 3.26)) | (26)                                | 1.35 (0.38, 4.76))  |
| <b>Grade:</b>                    |         |                     |              |                     |              |                     |                                     |                     |
| Well diff. (ref.)                | 38      | 1.00                | 5            | 1.00                | 18           | 1.00                | 38                                  | 1.00                |
| Mod diff.                        | 770     | 0.85 (0.31, 2.29)   | 53           | 2.29 (0.31, 16.79)  | 581          | 0.97 (0.35, 2.67)   | 770                                 | 0.71 (0.26, 1.92)   |
| Poorly/undiff.                   | 209     | 0.60 (0.20, 1.78)   | 19           | 1.11 (0.12, 10.68)  | 213          | 0.94 (0.33, 2.65)   | 209                                 | 0.52 (0.17, 1.58)   |
| (UK)                             | (81)    | (1.84 (0.60, 5.62)) | (9)          | NA                  | (86)         | (0.40 (0.13, 1.20)) | (81)                                | (1.24 (0.39, 3.93)) |
| <b>Diagnosis year:</b>           |         |                     |              |                     |              |                     |                                     |                     |
| 2000 - 2005                      | 541     | 1.00                | 52           | 1.00                | 451          | 1.00                | 541                                 | 1.00                |
| 2006 - 2010                      | 557     | 1.26 (0.87, 1.82)   | 34           | 0.31 (0.08, 1.25)   | 447          | 1.96 (1.48, 2.59)   | 557                                 | 1.29 (0.86, 1.94)   |

\*Derived from multivariate logistic regression (see "Methods")

RO – Relative odds; CLs – confidence limits; ref. – reference; NA – not applicable; ACPS- Australian Clinico-Pathological Staging; UK – unknown; diff – differentiated; undiff. - undifferentiated.

Table S3: Relative odds (95% CLs) of treatment for **rectal cancer** starting >30 days of diagnosis by treatment type, stage, and socioeconomic factors: South Australian major public hospitals, 2000-2010 diagnoses\*

|                                  | Surgery |                    | Radiotherapy |                    | Chemotherapy |                    | All treatment (surgical cases only) |                    |
|----------------------------------|---------|--------------------|--------------|--------------------|--------------|--------------------|-------------------------------------|--------------------|
|                                  | n=577   | RO (95% CLs)       | n=530        | RO (95% CLs)       | n=658        | RO (95% CLs)       | n=577                               | RO (95% CLs)       |
| <b>Age at diagnosis (years):</b> |         |                    |              |                    |              |                    |                                     |                    |
| <50 (ref.)                       | 38      | 1.00               | 66           | 1.00               | 80           | 1.00               | 38                                  | 1.00               |
| 50 - 59                          | 94      | 0.71 (0.31,1.62)   | 104          | 1.30 (0.62,2.71)   | 146          | 1.73 (0.86,3.48)   | 94                                  | 1.03 (0.46, 2.29)  |
| 60 - 69                          | 162     | 0.57 (0.26,1.24)   | 168          | 1.41 (0.71,2.79)   | 225          | 1.57 (0.83,2.99)   | 162                                 | 0.78 (0.37, 1.66)  |
| 70 - 79                          | 174     | 0.44 (0.20,0.95)   | 147          | 1.35 (0.67,2.71)   | 177          | 1.79 (0.90,3.54)   | 174                                 | 0.83 (0.40, 1.76)  |
| 80+                              | 109     | 0.38 (0.17,0.85)   | 45           | 1.40 (0.52,3.77)   | 30           | 2.01 (0.58,6.97)   | 109                                 | 0.70 (0.32, 1.55)  |
| <b>Sex:</b>                      |         |                    |              |                    |              |                    |                                     |                    |
| Male (ref.)                      | 331     | 1.00               | 344          | 1.00               | 419          | 1.00               | 331                                 | 1.00               |
| Female                           | 246     | 0.74 (0.52,1.07)   | 186          | 0.68 (0.43,1.07)   | 239          | 0.94 (0.61,1.45)   | 246                                 | 0.79 (0.55, 1.14)  |
| <b>Socioeconomic:</b>            |         |                    |              |                    |              |                    |                                     |                    |
| Low (ref.)                       | 208     | 1.00               | 181          | 1.00               | 220          | 1.00               | 208                                 | 1.00               |
| Low-med                          | 115     | 0.86 (0.50,1.45)   | 118          | 0.80 (0.42,1.51)   | 145          | 1.13 (0.62,2.07)   | 115                                 | 0.81 (0.48, 1.37)  |
| Med-high                         | 121     | 0.72 (0.44,1.19)   | 108          | 0.50 (0.26,0.94)   | 135          | 0.78 (0.43,1.42)   | 121                                 | 0.63 (0.38, 1.03)  |
| High                             | 133     | 1.06 (0.64,1.77)   | 123          | 0.88 (0.45,1.70)   | 158          | 1.00 (0.55,1.83)   | 133                                 | 1.03 (0.62, 1.72)  |
| <b>Accessibility:</b>            |         |                    |              |                    |              |                    |                                     |                    |
| High (ref.)                      | 454     | 1.00               | 409          | 1.00               | 507          | 1.00               | 454                                 | 1.00               |
| Med-high                         | 87      | 0.74 (0.29,1.88)   | 85           | 1.49 (0.50,4.44)   | 101          | 1.00 (0.30,3.36)   | 87                                  | 1.27 (0.49, 3.26)  |
| Poor                             | 36      | 1.00 (0.36,2.76)   | 36           | 1.25 (0.37,4.20)   | 50           | 0.88 (0.25,3.05)   | 36                                  | 1.58 (0.58, 4.33)  |
| <b>Local Health Network:</b>     |         |                    |              |                    |              |                    |                                     |                    |
| Northern metro (ref.)            | 93      | 1.00               | 94           | 1.00               | 107          | 1.00               | 93                                  | 1.00               |
| Central metro                    | 197     | 0.55 (0.31,0.97)   | 169          | 0.86 (0.44,1.70)   | 204          | 1.19 (0.64,2.23)   | 197                                 | 0.61 (0.35, 1.06)  |
| Southern metro                   | 136     | 0.40 (0.22,0.73)   | 118          | 0.61 (0.30,1.23)   | 174          | 0.89 (0.47,1.69)   | 136                                 | 0.44 (0.24, 0.80)  |
| Country South                    | 67      | 0.89 (0.37,2.10)   | 64           | 0.45 (0.17,1.25)   | 76           | 1.99 (0.62,6.41)   | 67                                  | 0.70 (0.30, 1.63)  |
| Country North                    | 84      | 0.67 (0.24,1.89)   | 85           | 1.48 (0.44,5.02)   | 97           | 2.61 (0.73,9.25)   | 84                                  | 0.57 (0.20, 1.62)  |
| <b>ACPS stage:</b>               |         |                    |              |                    |              |                    |                                     |                    |
| A (ref.)                         | 111     | 1.00               | 47           | 1.00               | 35           | 1.00               | 111                                 | 1.00               |
| B                                | 183     | 1.31 (0.79,2.18)   | 127          | 0.90 (0.39,2.06)   | 119          | 1.35 (0.57,3.21)   | 183                                 | 1.18 (0.71, 1.95)  |
| C                                | 160     | 1.65 (0.98,2.79)   | 210          | 1.39 (0.63,3.10)   | 287          | 3.81 (1.64,8.86)   | 160                                 | 1.43 (0.85, 2.40)  |
| D                                | 99      | 0.83 (0.46,1.51)   | 123          | 0.67 (0.30,1.51)   | 196          | 1.30 (0.58,2.95)   | 99                                  | 0.79 (0.43, 1.44)  |
| (UK)                             | 24      | (0.76 (0.28,2.06)) | 23           | (0.74 (0.23,2.39)) | 21           | (1.72 (0.44,6.71)) | 24                                  | (0.83 (0.30,2.28)) |
| <b>Grade:</b>                    |         |                    |              |                    |              |                    |                                     |                    |
| Well diff. (ref.)                | 20      | 1.00               | 20           | 1.00               | 19           | 1.00               | 20                                  | 1.00               |
| Mod diff.                        | 442     | 0.60 (0.21,1.68)   | 376          | 1.59 (0.57,4.44)   | 473          | 1.43 (0.43,4.70)   | 442                                 | 0.78 (0.29, 2.08)  |
| Poorly/undiff.                   | 76      | 0.52 (0.17,1.61)   | 80           | 2.63 (0.81,8.52)   | 96           | 2.14 (0.57,8.10)   | 76                                  | 0.71 (0.24, 2.08)  |
| (UK)                             | 39      | (1.38 (0.39,4.91)) | 54           | (1.31 (0.40,4.29)) | 70           | (0.72 (0.20,2.63)) | 39                                  | (1.57 (0.47,5.27)) |
| <b>Diagnosis year:</b>           |         |                    |              |                    |              |                    |                                     |                    |
| 2000 - 2005                      | 328     | 1.00               | 283          | 1.00               | 331          | 1.00               | 328                                 | 1.00               |
| 2006 - 2010                      | 249     | 2.86 (1.98,4.12)   | 247          | 1.76 (1.12,2.76)   | 327          | 1.34 (0.88,2.04)   | 249                                 | 3.09 (2.15, 4.43)  |

\*Derived from multivariate logistic regression (see "Methods")

RO – Relative odds; CLs – confidence limits; ref. – reference; ACPS- Australian Clinico-Pathological Staging; UK – unknown; diff – differentiated; undiff. - undifferentiated.

Table S4: Relative odds (95% CLs) of treatment for **rectal cancer** starting >60 days of diagnosis by treatment type, stage, and socio-demographic factors: South Australian major public hospitals, 2000-2010 diagnoses\*

|                                  | Surgery |                     | Radiotherapy |                     | Chemotherapy |                     | All treatment (surgical cases only) |                     |
|----------------------------------|---------|---------------------|--------------|---------------------|--------------|---------------------|-------------------------------------|---------------------|
|                                  | n=577   | RO (95% CLs)        | n=530        | RO (95% CLs)        | n=658        | RO (95% CLs)        | n=577                               | RO (95% CLs)        |
| <b>Age at diagnosis (years):</b> |         |                     |              |                     |              |                     |                                     |                     |
| <50 (ref.)                       | 38      | 1.00                | 66           | 1.00                | 80           | 1.00                | 38                                  | 1.00                |
| 50 - 59                          | 94      | 0.53 (0.23, 1.19)   | 104          | 2.41 (1.12, 5.17)   | 146          | 2.45 (1.26, 4.74)   | 94                                  | 1.28 (0.42, 3.93)   |
| 60 - 69                          | 162     | 0.49 (0.23, 1.05)   | 168          | 3.28 (1.60, 6.71)   | 225          | 3.46 (1.85, 6.49)   | 162                                 | 1.17 (0.40, 3.38)   |
| 70 - 79                          | 174     | 0.25 (0.12, 0.55)   | 147          | 2.69 (1.30, 5.56)   | 177          | 3.47 (1.82, 6.60)   | 174                                 | 1.21 (0.42, 3.48)   |
| 80+                              | 109     | 0.26 (0.11, 0.59)   | 45           | 3.05 (1.24, 7.51)   | 30           | 3.95 (1.54, 10.17)  | 109                                 | 1.62 (0.55, 4.80)   |
| <b>Sex:</b>                      |         |                     |              |                     |              |                     |                                     |                     |
| Male (ref.)                      | 331     | 1.00                | 344          | 1.00                | 419          | 1.00                | 331                                 | 1.00                |
| Female                           | 246     | 0.77 (0.52, 1.13)   | 186          | 0.91 (0.61, 1.36)   | 239          | 1.04 (0.73, 1.46)   | 246                                 | 0.89 (0.56, 1.42)   |
| <b>Socioeconomic:</b>            |         |                     |              |                     |              |                     |                                     |                     |
| Low (ref.)                       | 208     | 1.00                | 181          | 1.00                | 220          | 1.00                | 208                                 | 1.00                |
| Low-med                          | 115     | 1.29 (0.73, 2.27)   | 118          | 1.11 (0.65, 1.92)   | 145          | 0.61 (0.38, 0.98)   | 115                                 | 1.05 (0.53, 2.02)   |
| Med-high                         | 121     | 1.04 (0.61, 1.78)   | 108          | 0.95 (0.55, 1.62)   | 135          | 0.94 (0.59, 1.50)   | 121                                 | 1.25 (0.67, 2.33)   |
| High                             | 133     | 1.03 (0.60, 1.77)   | 123          | 1.28 (0.74, 2.22)   | 158          | 0.71 (0.44, 1.14)   | 133                                 | 0.81 (0.41, 1.58)   |
| <b>Accessibility:</b>            |         |                     |              |                     |              |                     |                                     |                     |
| High (ref.)                      | 454     | 1.00                | 409          | 1.00                | 507          | 1.00                | 454                                 | 1.00                |
| Med-high                         | 87      | 0.26 (0.09, 0.73)   | 85           | 1.12 (0.41, 3.01)   | 101          | 0.98 (0.42, 2.25)   | 87                                  | 0.49 (0.13, 1.86)   |
| Poor                             | 36      | 0.30 (0.10, 0.89)   | 36           | 1.53 (0.55, 4.31)   | 50           | 1.08 (0.45, 2.62)   | 36                                  | 0.83 (0.22, 2.67)   |
| <b>Local Health Network:</b>     |         |                     |              |                     |              |                     |                                     |                     |
| Northern metro (ref.)            | 93      | 1.00                | 94           | 1.00                | 107          | 1.00                | 93                                  | 1.00                |
| Central metro                    | 197     | 0.53 (0.30, 0.95)   | 169          | 0.88 (0.50, 1.55)   | 204          | 1.70 (1.00, 2.89)   | 197                                 | 0.71 (0.36, 1.38)   |
| Southern metro                   | 136     | 0.49 (0.26, 0.91)   | 118          | 0.55 (0.30, 1.03)   | 174          | 0.84 (0.48, 1.44)   | 136                                 | 0.63 (0.30, 1.30)   |
| Country South                    | 67      | 0.69 (0.29, 1.61)   | 64           | 0.45 (0.18, 1.14)   | 76           | 1.36 (0.59, 3.17)   | 67                                  | 0.71 (0.25, 2.05)   |
| Country North                    | 84      | 1.25 (0.42, 3.74)   | 85           | 0.70 (0.24, 2.01)   | 97           | 1.10 (0.44, 2.72)   | 84                                  | 0.67 (0.17, 2.71)   |
| <b>ACPS stage:</b>               |         |                     |              |                     |              |                     |                                     |                     |
| A (ref.)                         | 111     | 1.00                | 47           | 1.00                | 35           | 1.00                | 111                                 | 1.00                |
| B                                | 183     | 1.46 (0.82, 2.58)   | 127          | 1.26 (0.59, 2.67)   | 119          | 1.64 (0.69, 3.91)   | 183                                 | 1.04 (0.53, 2.02)   |
| C                                | 160     | 2.30 (1.30, 4.05)   | 210          | 1.76 (0.86, 3.58)   | 287          | 2.70 (1.19, 6.12)   | 160                                 | 1.15 (0.60, 2.24)   |
| D                                | 99      | 1.34 (0.69, 1.61)   | 123          | 1.25 (0.59, 2.67)   | 196          | 1.95 (0.85, 4.51)   | 99                                  | 0.83 (0.37, 1.86)   |
| (UK)                             | 24      | (1.65 (0.58, 4.67)) | 23           | (0.35 (0.09, 1.43)) | 21           | (1.33 (0.38, 4.68)) | 24                                  | (1.45 (0.46, 4.58)) |
| <b>Grade:</b>                    |         |                     |              |                     |              |                     |                                     |                     |
| Well diff. (ref.)                | 20      | 1.00                | 20           | 1.00                | 19           | 1.00                | 20                                  | 1.00                |
| Mod diff.                        | 442     | 0.30 (0.11, 0.82)   | 376          | 1.25 (0.45, 3.44)   | 473          | 1.39 (0.50, 3.88)   | 442                                 | 0.35 (0.13, 0.95)   |
| Poorly/un-diff.                  | 76      | 0.26 (0.09, 0.79)   | 80           | 1.70 (0.57, 5.09)   | 96           | 1.51 (0.50, 4.52)   | 76                                  | 0.35 (0.11, 1.12)   |
| (UK)                             | 39      | (0.64 (0.19, 2.18)) | 54           | (0.88 (0.28, 2.84)) | 70           | (0.83 (0.27, 2.59)) | 39                                  | (0.76 (0.23, 2.59)) |
| <b>Diagnosis year:</b>           |         |                     |              |                     |              |                     |                                     |                     |
| 2000 - 2005                      | 328     | 1.00                | 283          | 1.00                | 331          | 1.00                | 328                                 | 1.00                |
| 2006 - 2010                      | 249     | 1.98 (1.35, 2.91)   | 247          | 1.02 (0.70, 1.50)   | 327          | 1.21 (0.87, 1.69)   | 249                                 | 2.01 (1.26, 3.18)   |

\*Derived from multivariate logistic regression (see "Methods")

RO – Relative odds; CLs – confidence limits; ref. – reference; ACPS- Australian Clinico-Pathological Staging; UK – unknown; diff – differentiated; undiff. - undifferentiated.
